# Supplementary material for: Long-term impact of fecal transplantation in healthy volunteers
Source: PubMed Central journal article supplement (PMC6938016; doi:10.1186/s12866-019-1689-y), 2019-12-30
Supplement: 12866_2019_1689_MOESM1_ESM.pdf [file 12866_2019_1689_MOESM1_ESM.pdf]

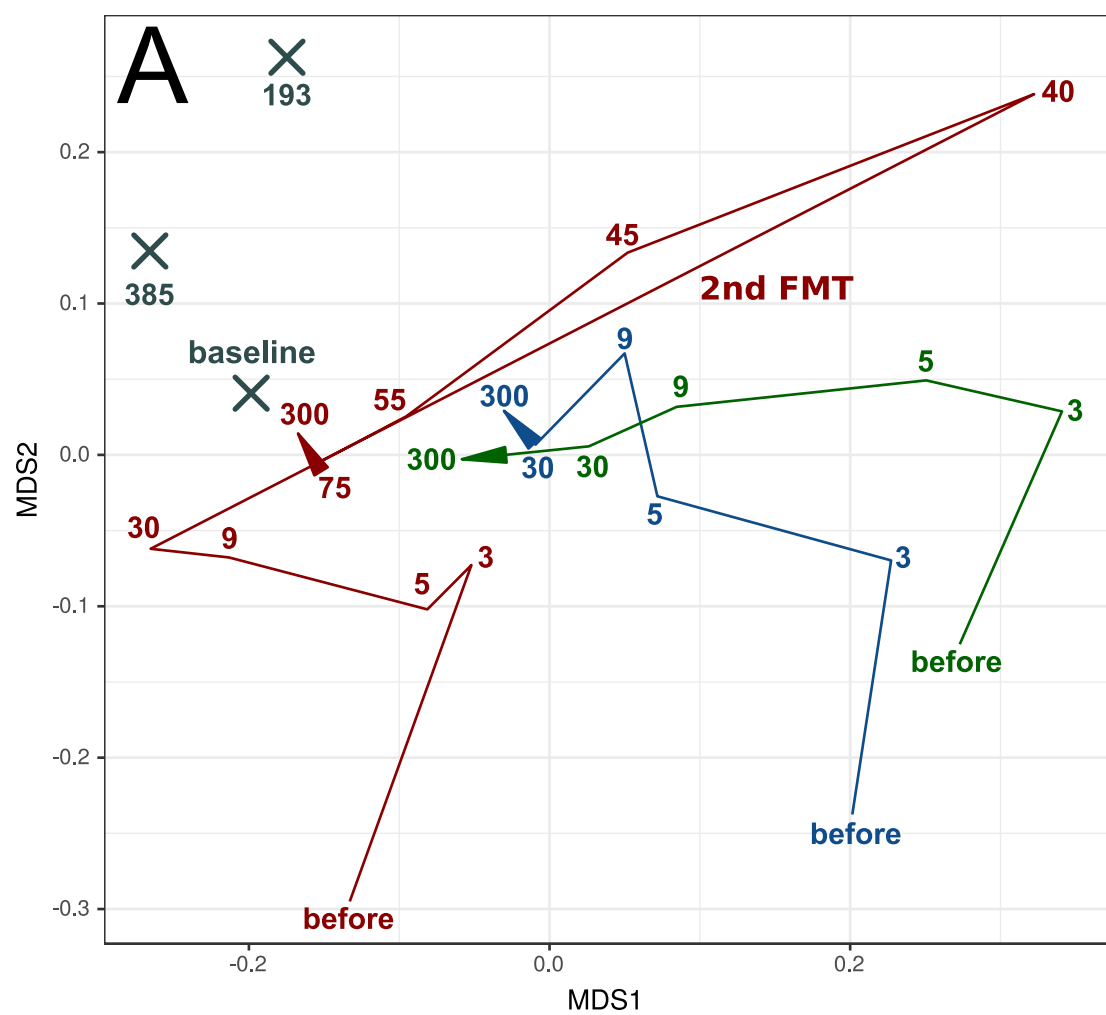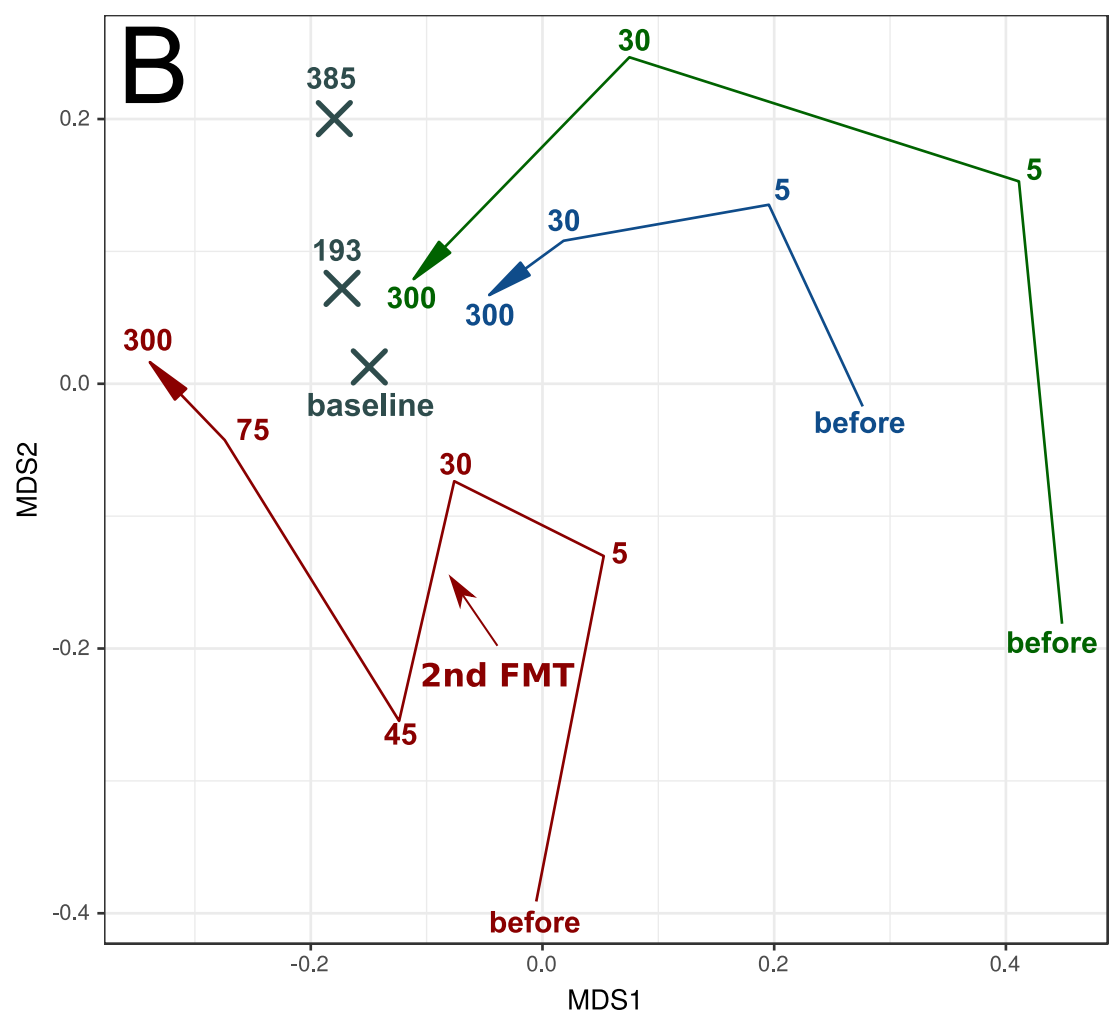

x Donor 
 ▶ V1 
 ▶ V2 
 ▶ V3
