# Supplementary material for: Long-term impact of fecal transplantation in healthy volunteers
Source: Springer Nature journal article supplement (doi:10.1186/s12866-019-1689-y), 2019-12-01

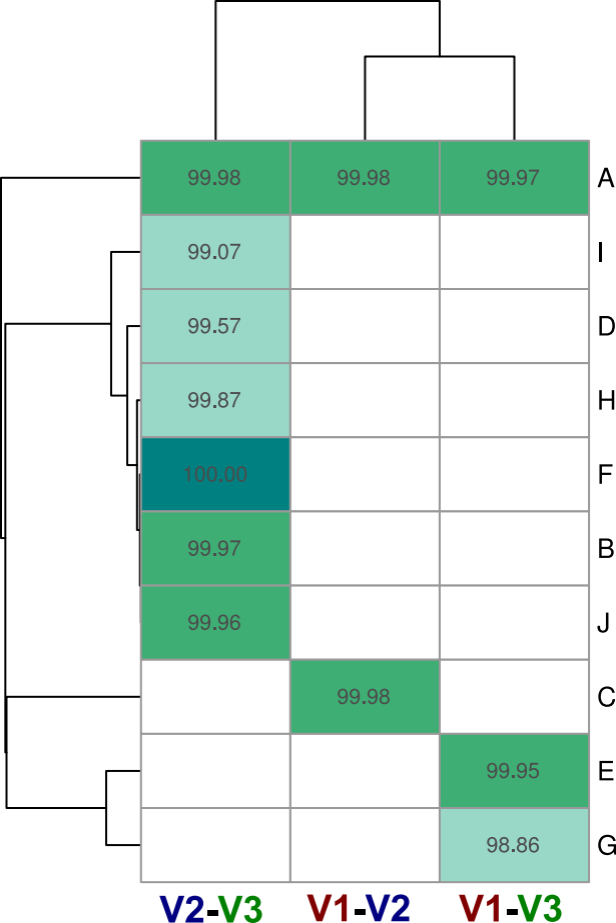

Supplement: 12866_2019_1689_MOESM4_ESM.pdf [file 12866_2019_1689_MOESM4_ESM.pdf]
